# Supplementary material
Source: Springer Nature journal article supplement (https://www.springermedizin.de/resource/supplementary/12884_2014_1161_MOESM1_ESM.pdf/9459062)
Supplement: MOESM1 [file 9459062]

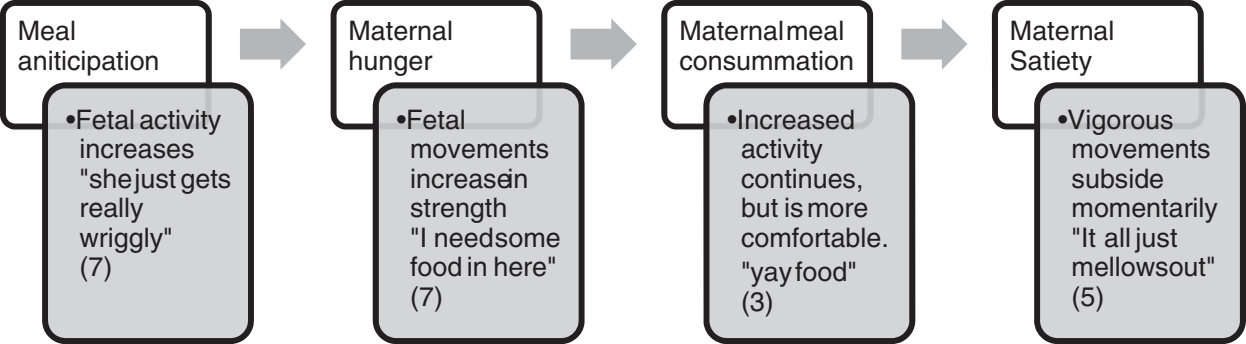

Meal  
anticipation

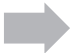

Maternal  
hunger

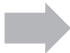

Maternal meal  
consummation

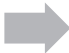

Maternal  
Satiety

- Fetal activity increases  
"she just gets really wriggly"  
(7)

- Fetal movements increase in strength  
"I need some food in here"  
(7)

- Increased activity continues, but is more comfortable.  
"yay food"  
(3)

- Vigorous movements subside momentarily  
"It all just mellows out"  
(5)
